# Supplementary material for: HAMP Domain Rotation and Tilting Movements Associated with Signal Transduction in the PhoQ Sensor Kinase
Source: PubMed Central journal article supplement — mBio. 2015 May 26;6(3):e00616-15. doi: 10.1128/mBio.00616-15 (PMC4447245; doi:10.1128/mbio.00616-15), 2015-05-26
Supplement: mbo003152324sf1.pdf [file mbo003152324sf1.pdf]

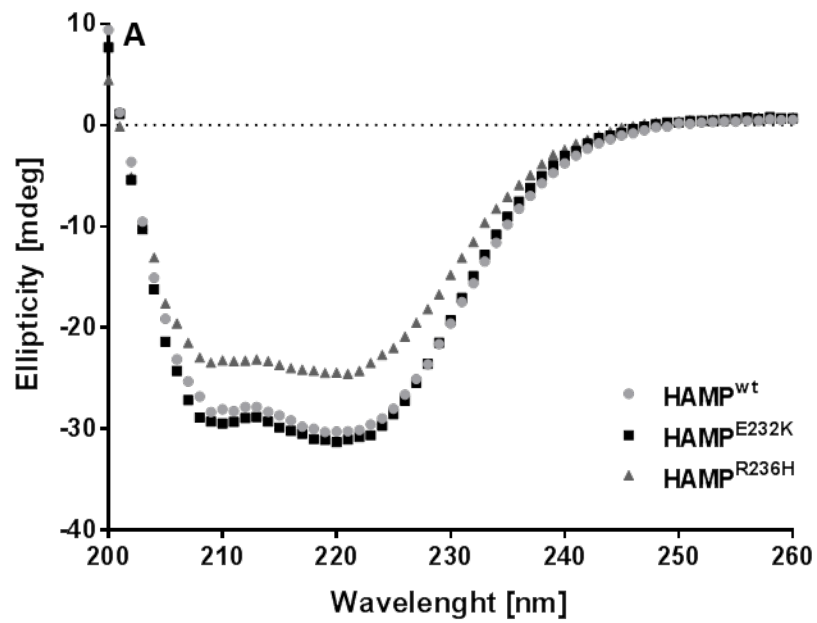

**Figure S1.** Circular dichroism(CD) of purified (●) HAMP<sup>wt</sup>, (■) HAMP<sup>E232K</sup> and (▲) HAMP<sup>R236H</sup>. Far-UV CD spectra collected at 10°C for each protein between 200 nm and 260 nm. All graphed values are the mean and representative of at least three independent trials.
