# Supplementary material for: HAMP Domain Rotation and Tilting Movements Associated with Signal Transduction in the PhoQ Sensor Kinase
Source: PubMed Central journal article supplement — mBio. 2015 May 26;6(3):e00616-15. doi: 10.1128/mBio.00616-15 (PMC4447245; doi:10.1128/mbio.00616-15), 2015-05-26
Supplement: mbo003152324sf2.pdf [file mbo003152324sf2.pdf]

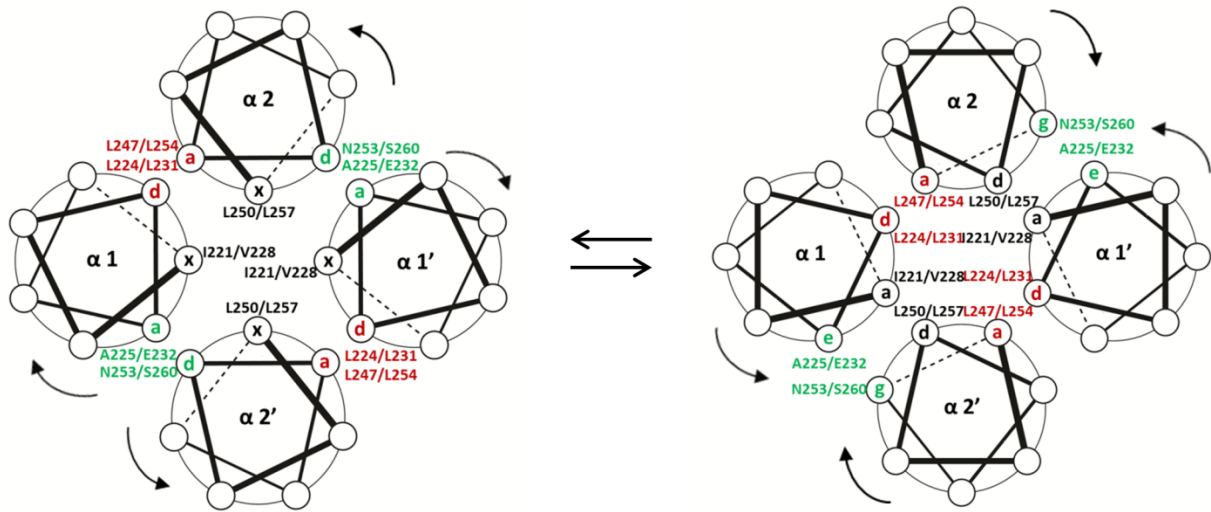

**Figure S2.** Helical wheel representation of a four helix bundle in a *x-da* packing (left) and in a *a-d* packing (right). The correspondent PhoQ residues are indicated.
