# Supplementary material for: HAMP Domain Rotation and Tilting Movements Associated with Signal Transduction in the PhoQ Sensor Kinase
Source: PubMed Central journal article supplement — mBio. 2015 May 26;6(3):e00616-15. doi: 10.1128/mBio.00616-15 (PMC4447245; doi:10.1128/mbio.00616-15), 2015-05-26
Supplement: mbo003152324sf3.pdf [file mbo003152324sf3.pdf]

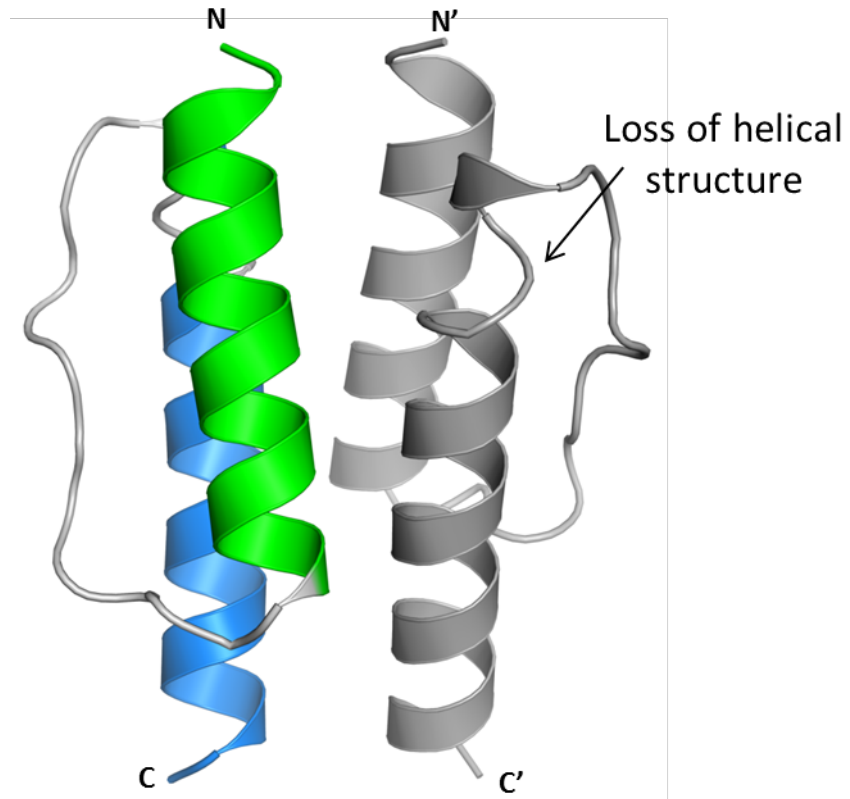

**Figure S3.** Model of PhoQ HAMP domain based on Aer2 HAMP1<sup>L44H</sup>. One monomer is shown in color with  $\alpha 1$  in green and  $\alpha 2$  in blue, the other monomer is colored grey.
