# Supplementary material for: HAMP Domain Rotation and Tilting Movements Associated with Signal Transduction in the PhoQ Sensor Kinase
Source: PubMed Central journal article supplement — mBio. 2015 May 26;6(3):e00616-15. doi: 10.1128/mBio.00616-15 (PMC4447245; doi:10.1128/mbio.00616-15), 2015-05-26
Supplement: mbo003152324sf4.pdf [file mbo003152324sf4.pdf]

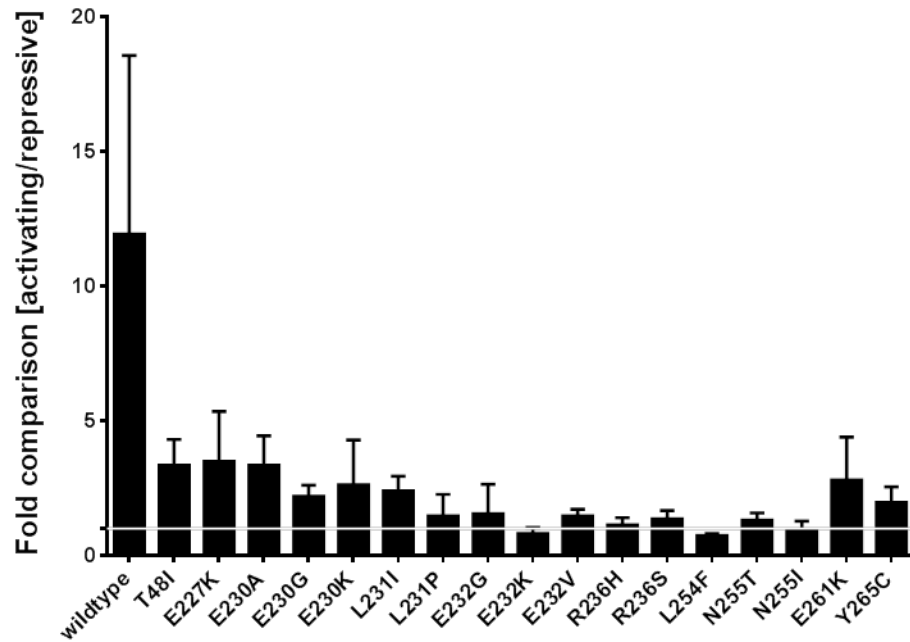

**Figure S4.** Comparison of phosphatase activity between activating (10  $\mu\text{M}$   $\text{MgCl}_2$ ) and repressive (10 mM  $\text{MgCl}_2$ ) growth conditions. Fold activation was obtained by dividing the activity at 10  $\mu\text{M}$   $\text{MgCl}_2$  by the activity at 10 mM  $\text{MgCl}_2$  for each strain. The white line indicates  $y=1$ . All graphed values are mean standard deviation and are representative of at least three independent trials.
