# Supplementary material for: HAMP Domain Rotation and Tilting Movements Associated with Signal Transduction in the PhoQ Sensor Kinase
Source: PubMed Central journal article supplement — mBio. 2015 May 26;6(3):e00616-15. doi: 10.1128/mBio.00616-15 (PMC4447245; doi:10.1128/mbio.00616-15), 2015-05-26
Supplement: mbo003152324sf5.pdf [file mbo003152324sf5.pdf]

|                           |                                                                           |     |
|---------------------------|---------------------------------------------------------------------------|-----|
| D0ZV89 S.typhimurium      | AAWWSLRPIEALAREVRELEDDHREMLNPETTRELTSLVRNLNLLKSERERYNKYRTTL               | 272 |
| Q7CJ04 Y.pestis           | AAWWSLRPIKALASIQSLEKGEREQLDENPPRELQSLVRNLNLLMNERQRYTKYRTTL                | 269 |
| S5U8Y3 P.mirabilis        | AAHWSLRPIKSIIEQISALEKGTDRNLDENPPKELKGLVYNLNLRRNRNRYSKYRTSL                | 271 |
| L7ZKQ8 S.marcescens       | AAWWSLRPIKALVNVQVLEENGERDQLDENPPSELRGLVLRNLNLLVRNERQRYTKYRTTL             | 270 |
| P23837 E.coli             | AAWWSLRPIEALAKEVRELEHNRRELLNPATRELTSLVRNLNLLKSERERYDKYRTTL                | 272 |
| Q83RR1 S.flexneri         | AAWWSLRPIEALAKEVRELEHNRRELLNPATRELTSLVRNLNLLKSERERYDKYRTTL                | 272 |
| W9BNY9 K.pneumoniae       | AAWWSLRPIESLAKVRELEHHRREKLNPNTRRELTRVSNLNRLLRVSERERYDKYRTTL               | 272 |
| D4GC75 P.ananatis         | AAHWSLRPIGHLTLQVRELEFGQRENLDNPPQELRSLVRNLNLLTNERQRYTRYRTTL                | 273 |
| W0HJT3 C.Sodalis          | AAHWSLRPIKDLVQRVRELEVGGERERLDENPPRELDIIVRNLNLLNNERQRYQYRTTL               | 272 |
| I2EJT1 C.sakazakii        | AAWWSLRPIEALAREVRELEHHRREKLNPNYPTRELTSLVHNLNLLKSERERYKYRTTL               | 272 |
| AOA076LLK5 E.tarda        | AAWWSLRPIKALATQVRELEKQGRDLSLENPPHELRLGLVLRNLNLLSNERQRYTRYRTTL             | 274 |
| Q7N3B1 P.luminescens      | AAHWSLRPIKSLIHQISSLEKGEREKLDENPPTELRLGLVLRNLNLLNNERNRYTKYRTTL             | 272 |
| G8LJP2 E.cloacae          | AAWWSLRPIESLAREVRELEHHRREKLNPNETRELTSLVRNLNLLKSERERYDKYRTTL               | 272 |
| X5EY00 P.aeruginosa       | GLTWGFRAMRGLSSELDQIEEGGERESLSEHPRELLRLTSHLNRLLSSEHKQRYRYRSHL              | 243 |
| I4L2U0 P.synxantha        | GLTWGLQALRRLSQELDQIEEGGTRESLSEHPRELLRLTGSNLRLLSHSEQRTRYRDSL               | 243 |
| L8NBB2 P.syringae         | GLTWGLRALRRLSQELDQIEEGGVRDLSSEHPSELLRLTDSNLRLLSRERQRTYRDSL                | 243 |
| E4R7S8 P.putida           | GLTWGLRRLRSLSHLDEVEESGARDLSSEHPRELLRLTRSLNRLLSRERQRTYRDSL                 | 243 |
| G8Q5P1 P.fluorescens      | GLTWGLRALRRLSQELDEIESGARESLSEHPRELLRLTGSNLRLLSYSEREQRSYRDSL               | 243 |
| Q87AY5 X.fastidiosa       | ILQWWSLRPI SHVINELAKVQGGQRMSEQHHPPELPTQSIINAFIESERENLDRQRNTL              | 272 |
| AOA088P3F0 P.stuartii     | AAWWSLRPIKSLVQSISLSEKGEREMLDENPPYELRGLVLRNLNLLTNERKRYSKYRTTL              | 253 |
| AOA093SV58 P.atrosepticum | GAHWSLRPIQHVLQVIAELKGTTRDQLDENPPRELFSLVKNLNLLNNERQRYHKYRTTL               | 268 |
|                           | *.: : : : : : : : : : : : : : : : : : : : : : : : : : : : : : : : : : : * |     |
| D0ZV89 S.typhimurium      | TDLTHSLKTPLAVLQSTLRSLRNEK-MSVSKAEPVMLEQISRISQQIGYYLHRASMRGSG              | 331 |
| Q7CJ04 Y.pestis           | ADLTHSLKTPLAVLQSTLRSLRNEK-MSVSKAEPVMLEQISRISQQIGYYLHRASMRGSG              | 329 |
| S5U8Y3 P.mirabilis        | SDLTHSLKTPLAVLQSTLRSLRNEK-MSVSKAEPVMLEQISRISQQIGYYLHRASMRGSG              | 331 |
| L7ZKQ8 S.marcescens       | SDLTHSLKTPLAVLQSTLRSLRNEK-MSVSKAEPVMLEQISRISQQIGYYLHRASMRGSG              | 330 |
| P23837 E.coli             | TDLTHSLKTPLAVLQSTLRSLRNEK-MSVSKAEPVMLEQISRISQQIGYYLHRASMRG-G              | 330 |
| Q83RR1 S.flexneri         | TDLTHSLKTPLAVLQSTLRSLRNEK-MSVSKAEPVMLEQISRISQQIGYYLHRASMRG-G              | 330 |
| W9BNY9 K.pneumoniae       | TDLTHSLKTPLAVMQSTLRSLRNEK-MSVSKAEPVMLEQISRISQQIGYYLHRASMRGSG              | 331 |
| D4GC75 P.ananatis         | ADLTHSLKTPLAVLQSTLRSLRNEK-MSVSKAEPVMLEQISRISQQIGYYLHRASMRGSG              | 333 |
| W0HJT3 C.Sodalis          | SDLTHSLKTPLAVLQSTLRSLRNEK-MSVSKAEPVMLEQISRISQQIGYYLHRASMRGSG              | 332 |
| I2EJT1 C.sakazakii        | TDLTHSLKTPLSVLQSTLRSLRNEK-MSVSKAEPVMLEQISRISQQIGYYLHRASMRGSG              | 331 |
| AOA076LLK5 E.tarda        | ADLTHSLKTPLAVLQSTLRSLRNEK-MSVSKAEPVMLEQISRISQQIGYYLHRASMRGSG              | 334 |
| Q7N3B1 P.luminescens      | ADLTHSLKTPLAVLQSTLRSLRNEK-MSVSKAEPVMLEQISRISQQIGYYLHRASMRGSG              | 332 |
| G8LJP2 E.cloacae          | TDLTHSLKTPLAVMQSTLRSLRNEK-MSVSKAEPVMLEQISRISQQIGYYLHRASMRGSG              | 331 |
| X5EY00 P.aeruginosa       | GDLAHSKTPLAVLQSTLRSLRNEK-MSVSKAEPVMLEQISRISQQIGYYLHRASMRGSG               | 301 |
| I4L2U0 P.synxantha        | DDLAHSKTPLAVLQSTLRSLRNEK-MSVSKAEPVMLEQISRISQQIGYYLHRASMRGSG               | 301 |
| L8NBB2 P.syringae         | DDLAHSKTPLAVLQSTLRSLRNEK-MSVSKAEPVMLEQISRISQQIGYYLHRASMRGSG               | 301 |
| E4R7S8 P.putida           | DDLAHSKTPLAVLQSTLRSLRNEK-MSVSKAEPVMLEQISRISQQIGYYLHRASMRGSG               | 301 |
| G8Q5P1 P.fluorescens      | DDLAHSKTPLAVLQSTLRSLRNEK-MSVSKAEPVMLEQISRISQQIGYYLHRASMRGSG               | 301 |
| Q87AY5 X.fastidiosa       | ADLTHSLKTPLAVLQSTLRSLRNEK-MSVSKAEPVMLEQISRISQQIGYYLHRASMRGSG              | 327 |
| AOA088P3F0 P.stuartii     | SDLTHSLKTPLAVLQSTLRSLRNEK-MSVSKAEPVMLEQISRISQQIGYYLHRASMRGSG              | 313 |
| AOA093SV58 P.atrosepticum | TDLTHSLKTPLAVLQSTLRSLRNEK-MSVSKAEPVMLEQISRISQQIGYYLHRASMRGSG              | 328 |
|                           | ***:*****:***: : : : : : : : : : : : : : : : : : : : : : : : : : : : : *  |     |
| D0ZV89 S.typhimurium      | VLLSRELHPVAPLLDNLISALNKVYQRKGVNISMDISPEISFVGEQNDFFVEVMGNVLDNA             | 391 |
| Q7CJ04 Y.pestis           | NVLGREIHSVPAALLDNLISALNKVYQRKGVNISMDISPEISFVGEQNDFFVEVMGNVLDNA            | 389 |
| S5U8Y3 P.mirabilis        | DITTRKHLHSLGGLDNLISALNKVYQRKGVNISMDISPEISFVGEQNDFFVEVMGNVLDNA             | 391 |
| L7ZKQ8 S.marcescens       | TVLTHREIHSVPAALLDNLISALNKVYQRKGVNISMDISPEISFVGEQNDFFVEVMGNVLDNA           | 390 |
| P23837 E.coli             | TLLSRELHPVAPLLDNLISALNKVYQRKGVNISMDISPEISFVGEQNDFFVEVMGNVLDNA             | 390 |
| Q83RR1 S.flexneri         | TLLSRELHPVAPLLDNLISALNKVYQRKGVNISMDISPEISFVGEQNDFFVEVMGNVLDNA             | 390 |
| W9BNY9 K.pneumoniae       | TLLSRELHPVAPLLDNLISALNKVYQRKGVNISMDISPEISFVGEQNDFFVEVMGNVLDNA             | 391 |
| D4GC75 P.ananatis         | NPLQRDLHVSGLDNLISALNKVYQRKGVNISMDISPEISFVGEQNDFFVEVMGNVLDNA               | 393 |
| W0HJT3 C.Sodalis          | NVLSRELHVSVPALLDNLISALNKVYQRKGVNISMDISPEISFVGEQNDFFVEVMGNVLDNA            | 392 |
| I2EJT1 C.sakazakii        | MLLSRELHPVAPLLDNLISALNKVYQRKGVNISMDISPEISFVGEQNDFFVEVMGNVLDNA             | 391 |
| AOA076LLK5 E.tarda        | SVLNREVHVSVAIALLDNLISALNKVYQRKGVNISMDISPEISFVGEQNDFFVEVMGNVLDNA           | 394 |
| Q7N3B1 P.luminescens      | STIMRKSVPALLDNLISALNKVYQRKGVNISMDISPEISFVGEQNDFFVEVMGNVLDNA               | 392 |
| G8LJP2 E.cloacae          | ALLSRELHPVAPLLDNLISALNKVYQRKGVNISMDISPEISFVGEQNDFFVEVMGNVLDNA             | 391 |
| X5EY00 P.aeruginosa       | --LVRHREKLAFLVETLCDALDKVYRDKRVSLQDRFSPSFSVPVERGALLELGNLLENA               | 359 |
| I4L2U0 P.synxantha        | --LVRHQVRLPEVLSQSLCTLKDYRDKRVVTFDLPPECDVPIEKGALLELGNLLENA                 | 359 |
| L8NBB2 P.syringae         | --LVRHVMRLRPFVLESCDNLTKDYRDKRVVTFDLPPECDVPIEKGALLELGNLLENA                | 359 |
| E4R7S8 P.putida           | --LVRHVSLLRPLDNLISALNKVYQRKGVNISMDISPEISFVGEQNDFFVEVMGNVLDNA              | 359 |
| G8Q5P1 P.fluorescens      | --LVRHQVPLRPFVLSQSLCTLKDYRDKRVVTFDLPPECDVPIEKGALLELGNLLENA                | 359 |
| Q87AY5 X.fastidiosa       | --LFSAPVLIINFATAEIIVRGLEKVIYAAKGVLCFEFIDPKACFYGEPGDLQELLELGNLLENA         | 385 |
| AOA088P3F0 P.stuartii     | NLMLREISSVPSLLDNLISALNKVYQRKGVNISMDISPEISFVGEQNDFFVEVMGNVLDNA             | 373 |
| AOA093SV58 P.atrosepticum | NLLIREVHVSVPALLDNLISALNKVYQRKGVNISMDISPEISFVGEQNDFFVEVMGNVLDNA            | 388 |
|                           | : : : : * * * * : : : : : : : : : : : : : : : : : : : : : : : : : : : : * |     |

**Figure S5.** ClustalO primary sequence alignment of several PhoQ homologs. For simplicity only the neighboring regions to residues at positions 232 and 336 in *S. Typhimurium* are shown. The glutamate at

position 232 and the arginine at position 336 in *S. Typhimurium* and at equivalent positions in the other PhoQ sequences are indicated in red and blue respectively.
