# Supplementary material for: HAMP Domain Rotation and Tilting Movements Associated with Signal Transduction in the PhoQ Sensor Kinase
Source: PubMed Central journal article supplement — mBio. 2015 May 26;6(3):e00616-15. doi: 10.1128/mBio.00616-15 (PMC4447245; doi:10.1128/mbio.00616-15), 2015-05-26
Supplement: mbo003152324st1.pdf [file mbo003152324st1.pdf]

| PhoQ allele | Fold activation | PhoQ allele | Fold activation |
|-------------|-----------------|-------------|-----------------|
| R219C       | 2.27            | R236S       | 15.63           |
| P220H       | 3.16            | L239F       | 7.09            |
| I221N       | 1.29            | L239P       | 5.60            |
| R226W       | 3.02            | P241L       | 1.84            |
| E227V       | 2.74            | P241T       | 1.46            |
| E227K       | 15.10           | E242K       | 1.37            |
| V228I       | 3.64            | T244K       | 9.68            |
| R229L       | 4.97            | R245C       | 2.35            |
| E230A       | 13.29           | R245L       | 9.63            |
| E230G       | 19.33           | E246D       | 2.02            |
| E230K       | 12.48           | L247Q       | 4.35            |
| L231F       | 5.27            | L247P       | 7.74            |
| L231R       | 3.24            | L250H       | 2.09            |
| L231I       | 12.12           | R252C       | 2.08            |
| L231V       | 9.05            | L254I       | 8.79            |
| L231P       | 11.63           | L254F       | 26.59           |
| E232G       | 17.52           | L254V       | 3.73            |
| E232K       | 36.16           | N255T       | 21.78           |
| E232V       | 16.41           | N255I       | 24.46           |
| D233G       | 1.14            | L257Q       | 0.84            |
| D233Y       | 2.26            | L258F       | 6.39            |
| D233V       | 3.99            | E261K       | 13.28           |
| H234Q       | 5.69            | Y265C       | 14.78           |
| R236H       | 19.33           | N266S       | 4.68            |

**Table S1.** Fold activation of the different PhoQ alleles when compared to wild-type grown under PhoQ repressive conditions. The mean activity of alkaline phosphatase was determined for each allele in at least three independent experiments and then compared to the mean wild-type activity. All strains were grown in N minimal media in the presence of 10 mM MgCl<sub>2</sub>. Amino acid substitutions resulting in 10 fold increase in activity above the wild-type are shown over a grey background.
